# Supplementary material for: The unique role of smartphone addiction and related factors among university students: a model based on cross-sectional and cross-lagged network analyses
Source: Springer Nature journal article supplement (doi:10.1186/s12888-023-05384-6), 2023-11-27
Supplement: MOESM1 [file 26363322]

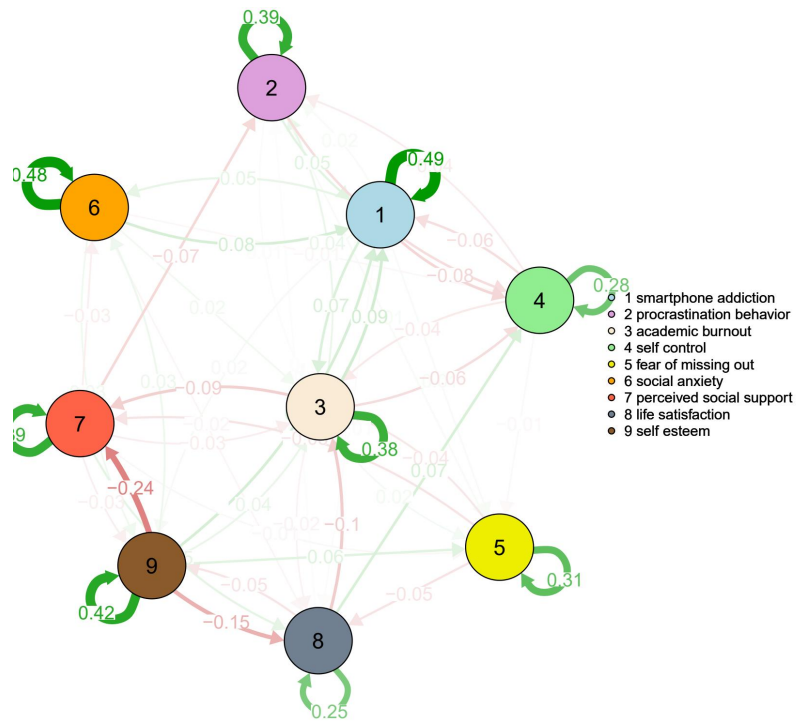

Appendix Fig A1. The cross-lagged panel network estimations of smartphone addiction and its influencing factors among university students from T1 to T2.
